## **De novo assembly, characterization, functional annotation and expression patterns of the black tiger shrimp (*Penaeus monodon*) transcriptome**

Roger Huerlimann<sup>1,2\*†</sup>, Nicholas M Wade<sup>1,3†</sup>, Lavinia Gordon<sup>1,4</sup>, Juan D Montenegro<sup>4</sup>, Jake Goodall<sup>1,3</sup>, Sean McWilliam<sup>3</sup>, Matthew Tinning<sup>1,4</sup>, Kirby Siemering<sup>1,4</sup>, Erika Giardina<sup>1,5</sup>, Dallas Donovan<sup>1,5</sup>, Melony J Sellars<sup>1,3</sup>, Jeff A Cowley<sup>1,3</sup>, Kelly Condon<sup>1,2</sup>, Greg J Coman<sup>1,7</sup>, Mehar S Khatkar<sup>1,6</sup>, Herman W Raadsma<sup>1,6</sup>, Gregory Maes<sup>8,9</sup>, Kyall R Zenger<sup>1,2</sup>, and Dean R Jerry<sup>1,2</sup>.

\*Corresponding author: [roger.huerlimann@jcu.edu.au](mailto:roger.huerlimann@jcu.edu.au)

†These two authors contributed equally to the writing of this publication

### Affiliations:

1. ARC Research Hub for Advanced Prawn Breeding
2. Centre for Sustainable Tropical Fisheries and Aquaculture, College of Science and Engineering, James Cook University, Townsville, QLD 4811, Australia
3. CSIRO Agriculture and Food, Integrated Sustainable Aquaculture Program, 306 Carmody Road, St Lucia, QLD 4067 Australia
4. Australian Genome Research Facility Ltd, The Walter and Eliza Hall Institute, 1G Royal Parade, Parkville VIC 3050
5. Seafarms Group Ltd, Level 11 225 St Georges Terrace Perth, WA 6000.
6. Sydney School of Veterinary Science, Faculty of Science, The University of Sydney, NSW, Australia
7. CSIRO Agriculture and Food, Integrated Sustainable Aquaculture Program, 144 North Street, Woorim, QLD 4507 Australia
8. Laboratory of Biodiversity and Evolutionary Genomics, KU Leuven, Leuven, 3000, Belgium
9. Center for Human Genetics, UZ Leuven- Genomics Core, KU Leuven, Leuven, 3000, Belgium

## **Declarations**

### Availability of data and material

Raw data, assembly and bioinformatics scripts will be made freely available online upon publication.

### Funding

This work was funded by the Australian Research Council (ARC) Industrial Transformation Research Hub scheme, awarded to James Cook University and in collaboration with the Commonwealth Scientific Industrial Research Organisation (CSIRO), the Australian Genome Research Facility (AGRF), the University of Sydney and Seafarms Group Pty Ltd.

### Authors' contributions

RH: conceptualised, developed and oversaw the project, performed sampling and carried out RNA extractions, developed and performed the transcriptome assembly, quality assessment and differential gene analysis, and wrote the manuscript. NMW: conceptualised and developed the project, performed sampling, led components of data analysis and interpretation and wrote the manuscript. LG: developed the transcriptome assembly bioinformatics pipeline. JDM: carried out the lncRNA analysis and assisted with the transcriptome assembly bioinformatics pipeline. JG: carried out sampling and RNA extractions, and assisted with development of the transcriptome assembly bioinformatics pipeline, and reviewed the manuscript. SM: assisted with the bioinformatic analysis of the differential gene expression data and reviewed manuscript. MT: oversaw the library preparation and sequencing, and reviewed the manuscript. KS: conceptualised and developed the project and reviewed manuscript. EG: reared and sampled the larval stages. DD: conceptualised and developed the project. Coordinated facilities and resources for larval and adult prawn production and reviewed manuscript. MS: provided prawn tissue samples, conceptualised and developed the project, assisted with data interpretation and reviewed manuscript. JC: assisted with the interpretation and writing of the viral analysis, and edited manuscript. KC: assisted with the interpretation and writing of the viral analysis, and reviewed manuscript. GC: conceptualised and developed the project and reviewed manuscript. MK: conceptualised and developed the project and reviewed manuscript. HR: conceptualised and developed the project and reviewed manuscript. GM: conceptualised and developed the project, performed sampling, provided advice on sequencing strategies and data interpretation and reviewed manuscript. KRZ: conceptualised and developed the project and reviewed manuscript. DRJ: conceptualised and developed the project, oversaw coordination of project activities and reviewed manuscript

All authors read and approved the final manuscript.

## 1 **Abstract**

2 The black tiger shrimp (*Penaeus monodon*) remains the second most widely cultured  
3 shrimp species globally. However, issues with disease and domestication have seen  
4 production levels stagnate over the past two decades. To help identify innovative  
5 solutions needed to resolve bottlenecks hampering the culture of this species, it is  
6 important to generate genetic and genomic resources. Towards this aim, we have  
7 produced the most complete publicly available *P. monodon* transcriptome database  
8 to date. The assembly was carried out in multiple assemblers using 2x125 bp HiSeq  
9 data from PolyA selected, ribo-depleted RNA extracted from nine adult tissues and  
10 eight early life-history stages. In total, approximately 700 million high-quality  
11 sequence reads were obtained and assembled into 236,388 clusters. These were  
12 then further segregated into 99,203 adult tissue specific clusters, and 58,678 early  
13 life-history stage specific clusters. The final transcriptome had a high TransRate  
14 score of 0.37, with 88% of all reads successfully mapping back to the transcriptome.  
15 BUSCO statistics showed the assembly to be highly complete with low  
16 fragmentation, few genes missing, but higher redundancy or transcript duplication  
17 (Complete: 98.2% (Duplicated: 51.3%), Fragmented: 0.8%, Missing: 1.0%), and to  
18 greatly exceed the completeness of existing *P. monodon* transcriptomes. While  
19 annotation rates were low (approximately 30%), as is typical for a non-model  
20 organisms, annotated transcript clusters were successfully mapped to several  
21 hundred functional KEGG pathways. To help address the lack of annotation,  
22 transcripts were clustered into groups within tissues and early life-history stages,  
23 providing initial evidence for their roles in specific tissue functions, or developmental  
24 transitions. Additionally, transcripts of shrimp viruses previously not known to occur  
25 in Australia were also discovered. We expect the transcriptome to provide an  
26 essential resource to investigate the molecular basis of commercially relevant-  
27 significant traits in *P. monodon* and other shrimp species.

28

## 29 **Introduction**

30 The black tiger shrimp *Penaeus monodon* belongs to the family Penaeidae and is  
31 the second most widely farmed shrimp species globally<sup>1</sup>. However, disease and  
32 limited progress in domestication and selective breeding of *P. monodon* continue to  
33 hamper further expansion of the industry<sup>2</sup>. Modern genomic technologies have  
34 significant potential to advance selective breeding programs; however, they require  
35 complete, well annotated tissue-specific transcriptomic and genomic datasets. In  
36 addition to assisting in genome assembly and creating linkage maps<sup>3</sup>, a complete  
37 transcriptome provides a potential resource for differential gene-expression  
38 studies<sup>4</sup>), genome annotation<sup>5</sup>, single nucleotide polymorphism discovery<sup>6</sup> and  
39 genome scaffolding<sup>7</sup>.

40 While genomic resources for Penaeid shrimp are increasing, they remain limited for  
41 many species, including *P. monodon*. Previous research has focussed on  
42 hepatopancreas, ovary, heart, muscle and eyestalk tissues<sup>8,9</sup>, in male and female  
43 gonads<sup>10</sup>, and in response to infection with *Vibrio* bacterial species capable of  
44 inducing acute hepatopancreatic necrosis disease<sup>11</sup>. In addition to such differential  
45 gene-expression studies, genomic data from next generation sequencing (NGS)  
46 methods has expanded greatly in recent years, particularly in the study of Pacific  
47 white shrimp (*Litopenaeus vannamei*)<sup>3,6,12-23</sup>. Moreover, a transcriptome based on  
48 eight tissues was assembled for the less well studied banana shrimp  
49 *Fenneropenaeus merguensis*<sup>24</sup>, and genes involved in early embryonic specification  
50 have been studied in *Marsupenaeus japonicus*<sup>25</sup>. Transcriptomics has also been  
51 applied to *Penaeus merguensis*<sup>26-28</sup> and the Chinese white shrimp *Fenneropenaeus*  
52 *chinensis*<sup>29,30</sup> to investigate aspects of tissue-specific expression, stress tolerance  
53 and viral infection. Despite these advances, a comprehensive transcriptome from  
54 diverse tissue types and early life-history stages of *P. monodon* remains unavailable.

55 In order to address this deficiency, we report a highly complete transcriptome for *P.*  
56 *monodon* that can be used as a broad basis for future genomics research. To this  
57 effect, we sequenced three replicates each from nine different tissues types  
58 (eyestalk, stomach, female gonad, male gonad, gill, haemolymph, hepatopancreas,  
59 lymphoid organ and tail muscle) and one pooled replicate each from four larval  
60 stages (embryo, nauplii, zoea, and mysis) and four post-larval stages ranging from  
61 days 1, 4, 10 and 15. Additionally, transcript expression profiles unique to each type  
62 and stage were determined, as well as identifying putative long non-coding RNA and  
63 transcripts originating from viruses.

64

## 65 **Material and Methods**

### 66 ***Sample taking and RNA extraction***

67 Tissues of *P. monodon* broodstock were collected from multiple individuals,  
68 immediately snap frozen on dry ice, and stored at -80°C until extraction (Table 1). All  
69 tissues except lymphoid organs were collected from wild broodstock caught off  
70 coastal waters near the border between the Northern Territory and Western Australia  
71 provided, which were provided by a commercial hatchery at Flying Fish Point, North  
72 Queensland, Australia. Lymphoid organ tissue was collected from wild prawns  
73 caught off the East Coast of Queensland. Larval and post-larval stages were  
74 collected from the same hatchery in pools of approximately 400 individuals per life  
75 stage, after four hours of starvation, and preserved in RNAlater (Thermo Fisher  
76 Scientific). All tissues and early life-history stages were sub-sampled in an RNase-  
77 free laboratory and total RNA was extracted using an RNeasy Universal extraction  
78 kit (QIAGEN) following manufacturer's instructions. RNA quantity and quality was  
79 estimated using a Nanodrop UV spectrophotometer (Thermo Fisher Scientific), and  
80 purity was further assessed using an Agilent Bioanalyzer (Agilent Technologies).  
81 RNA was selected from individual sample replicates based on Nanodrop spectra,  
82 RNA concentration, and Agilent Bioanalyzer traces (Table 1), in preference to using  
83 comparative tissues from the same individuals.

### 84 ***Illumina library preparation and sequencing***

85 Library preparation and sequencing was carried out at the Australian Genome  
86 Research Facility (AGRF). Upon arrival at the sequencing facility, the quality of the  
87 samples was checked using a Bioanalyzer RNA 6000 nano reagent kit (Agilent) and  
88 libraries were prepared using the TruSeq Stranded mRNA Library Preparation Kit  
89 (Illumina) according to established protocols. Final libraries were again checked  
90 using TapeStation DNA 1000 TapeScreen Assay (Agilent). Cluster generation was  
91 performed on a cBot with HiSeq PE Cluster Kit v4 - cBot and sequencing was done  
92 on a HiSeq 2500 using a HiSeq SBS Kit. The HiSeq 2500 was operating with HiSeq  
93 Control Software v2.2.68 and base-calling was performed with RTA v1.18.66.3.  
94 Samples in the second sequencing run were pooled and split across two lanes to  
95 reduce sequencing bias (Table 1).

96

97 **Table 1 | List of shrimp tissue types and early life-history stages**  
 98 **used for transcriptome sequencing.** PL = post-larval stages 1  
 99 (PL1), 4 (PL4), 10 (PL10), 15 (PL15)

| Shrimp ID | Sex    | Tissue         | Number of paired-end reads |
|-----------|--------|----------------|----------------------------|
| PM_F_08   | Female | Eyestalk       | 18,984,152                 |
|           |        | Gill           | 19,971,115                 |
| PM_F_02   | Female | Hepatopancreas | 18,831,682                 |
|           |        | Female Gonad   | 21,338,933                 |
|           |        | Haemolymph     | 20,105,399                 |
|           |        | Muscle         | 20,361,299                 |
| PM_F_04   | Female | Stomach        | 13,470,106                 |
|           |        | Female Gonad   | 20,255,448                 |
|           |        | Gill           | 21,362,076                 |
|           |        | Haemolymph     | 20,247,206                 |
| PM_F_03   | Female | Stomach        | 21,461,589                 |
|           |        | Female Gonad   | 20,759,890                 |
| PM_M_02   | Male   | Female Gonad   | 20,759,890                 |
|           |        | Eyestalk       | 21,076,111                 |
|           |        | Hepatopancreas | 19,029,973                 |
|           |        | Male Gonad     | 20,669,419                 |
| PM_M_04   | Male   | Muscle         | 20,129,858                 |
|           |        | Eyestalk       | 22,250,295                 |
|           |        | Gill           | 20,396,956                 |
|           |        | Haemolymph     | 21,637,767                 |
|           |        | Hepatopancreas | 20,854,492                 |
|           |        | Male Gonad     | 20,600,256                 |
| PM_M_06   | Male   | Muscle         | 22,464,431                 |
|           |        | Stomach        | 16,444,377                 |
|           |        | Male Gonad     | 19,800,274                 |
|           |        | Lymphoid Organ | 19,873,753                 |
| PM_M_C2   | Male   | Lymphoid Organ | 20,480,178                 |
| PM_M_C3   | Male   | Lymphoid Organ | 20,372,862                 |
| PM_F_C1   | Female | Lymphoid Organ | 20,372,862                 |
| Pool_E    |        | Embryo         | 19,745,313                 |
| Pool_N    |        | Nauplii        | 18,310,089                 |
| Pool_Z    |        | Zoea           | 19,528,689                 |
| Pool_M    |        | Mysis          | 19,744,563                 |
| Pool_PL1  |        | PL1            | 19,815,103                 |
| Pool_PL4  |        | PL4            | 18,680,555                 |
| Pool_PL10 |        | PL10           | 18,773,667                 |
| Pool_PL15 |        | PL15           | 19,661,826                 |

## 101 ***Sequence quality control, assembly and annotation***

102 Raw sequence data was quality checked using FastQC<sup>31</sup> v0.11.5, and assembled  
103 loosely following the Oyster River Protocol for Transcriptome Assembly<sup>32</sup>. In brief, all  
104 sequences were collectively error-corrected using RCorrector<sup>33</sup> V3. Samples were  
105 then assembled in Trinity<sup>34</sup> V2.3.2; grouped by individual shrimps, i.e. all tissues  
106 from a specific shrimp were assembled together. Reads were trimmed harshly for  
107 adapters and softly for Phred score <2 using Trimmomatic<sup>35</sup> V0.32; and then  
108 normalized *in silico* within Trinity. The normalized forward and reverse reads  
109 produced by Trinity were then used in BinPacker<sup>36</sup> V1.0, IDBA-Tran<sup>37</sup> V 1.1.1 using  
110 K20, K30, K40, K50 and K60; and Bridger<sup>38</sup> version 2014-12-01. All resulting  
111 transcriptomes were concatenated and merged using Evidential Gene<sup>39</sup>, followed by  
112 clustering using Transfuse V0.5.0 (<https://github.com/cbournnell/transfuse>) using a  
113 similarity value of 0.98. Lastly, contigs <300 bp were removed to produce the final  
114 transcriptome. The quality of the final assembly was assessed using TransRate<sup>40</sup>  
115 V1.0.1, and BUSCO<sup>41</sup> V2 using the arthropoda\_odb9 database<sup>42</sup>. Sequences were  
116 annotated in Blast2Go<sup>43</sup> using the SWISS-PROT database<sup>44</sup> (accessed 17/03/2017),  
117 and separately using the arthropod and viral subsections of the GenBank nr  
118 database (accessed 06/06/2017).

## 119 ***Identification of long non-coding RNAs***

120 FEELnc<sup>45</sup> was used for the identification of long non-coding RNAs. The coding  
121 transcripts training set was constructed from the 1,047 complete universal single  
122 copy orthologous genes found with BUSCO v2.0 (database arthropoda\_odb9<sup>42</sup>). The  
123 mode “shuffle” was used to generate a training set of lncRNA from the debris of the  
124 known coding RNA transcripts.

## 125 ***Mapping and differential gene expression analysis***

126 Before mapping, error-corrected raw sequence reads were trimmed using the same  
127 parameters as before, but without palindrome trimming used by Trinity. Sequence  
128 reads were mapped using Bowtie2<sup>46</sup> V2.2.8, and read counts were calculated using  
129 Corset<sup>47</sup> V1.0.6. Differential gene expression was analyzed using DESeq2<sup>48</sup> V1.16.1  
130 in RStudio<sup>49</sup> V3.4.1.

131 To reduce the number of sequences for KEGG analysis, the longest contig per  
132 cluster was chosen from the combined tissue type and early life-history stage data.  
133 The KEGG Automatic Annotation Server (KAAS, <http://www.genome.jp/tools/kaas/>)  
134 was used to generate KEGG pathway maps for each contig using BLAST with the  
135 single-directional best hit (SBH) method. All scripts will be deposited on GitHub upon  
136 acceptance.

137

## 138 **Statistical analyses**

139 For data analysis, the top 2,000 variably expressed genes across the nine tissue  
140 types and the top 500 variably expressed genes across the four larval and four post-  
141 larval stages were visualized in a principal component analysis and heatmap using  
142 variance-stabilizing transformed read-count data from DESeq2. The gene level  
143 dendrograms in the heatmap were created using Pearson's correlation for both the  
144 tissue type larval/post-larval stages. Euclidean distance was used to cluster tissue  
145 types. All statistical analyses were performed in RStudio. Detailed information on the  
146 analyses can be found on GitHub upon acceptance.

147

## 148 **Results**

### 149 **Sequence read data and code availability**

150 In total, nine tissues were sequenced in biological triplicates, as well as pools of  
151 eight early life-history stages, resulting in an average of  $19.9 \text{ M} \pm 1.6 \text{ M}$  (mean  $\pm$  SD)  
152 read pairs per sample and 697 M reads in total (Table 1). After quality trimming,  
153  $99.5\% \pm 0.6\%$  (mean  $\pm$  SD) of reads were retained, indicating a high quality data set  
154 ( $>90\%$  reads with  $\geq Q30$ ). All read data are available on GenBank through the project  
155 ID PRJNA421400.

### 156 **Transcriptome assembly and quality control**

157 The initial combined outputs of all four assemblers comprised of 6,113,055 contigs,  
158 which were reduced to 462,772 contigs after filtering with Evidential Gene and  
159 combining both "okay" and "alternative" contigs. After clustering with Transfuse, the  
160 final assembly consisted of 236,388 transcripts with an assembly size of 226 Mb.  
161 These, together with transcript annotations, are available on GenBank. The final  
162 transcriptome had a high TransRate score of 0.37, with 88% of all reads successfully  
163 mapping back to the transcriptome, and only 3.2% of bases being uncovered. Based  
164 on BUSCO, the transcriptome was highly complete with 98% of arthropod ortholog  
165 genes being present, and few fragmented or missing genes; however, 51% of the  
166 contigs were duplicated/redundant  
167 (C:98.2%[S:46.9%,D:51.3%],F:0.8%,M:1.0%,n:1066).

### 168 **Annotation and gene ontology mapping**

169 Annotation against the SwissProt database using BLASTx resulted in 47,871  
170 successfully annotated contigs. Of these, 46,977 were successfully GO mapped, of  
171 which 41,069 were completely annotated. The top-hit species distribution was  
172 dominated by *Homo sapiens* with over 10,000 hits, followed by *Drosophila*  
173 *melanogaster* with just over 8,000 hits; no shrimp species made it into the list



174 (Fig. 1). GO terms for biological processes, molecular function and cellular  
 175 components were all highly represented in annotated genes (Fig. 2).

176 The annotation against the non-redundant Arthropod (nrA) database using BLASTx  
 177 resulted in 62,679 successfully annotated contigs, of which 48,456 had a successful  
 178 GO mapping, and of which 25,201 were completely annotated. The top-hit species  
 179 distribution was dominated by the freshwater amphipod *Hyaella azteca* with over  
 180 20,000 hits, followed by *P. monodon* with just over 2,500 hits (Fig. 1). Other penaeid  
 181 shrimp species included *Litopenaeus vannamei*, *Marsupenaeus japonicus* and  
 182 *Fenneropenaeus chinensis*, which were the sixth, seventh and twelfth most highly  
 183 represented species respectively.

184 Detailed information on the annotations can be found in Supplementary Table 1.

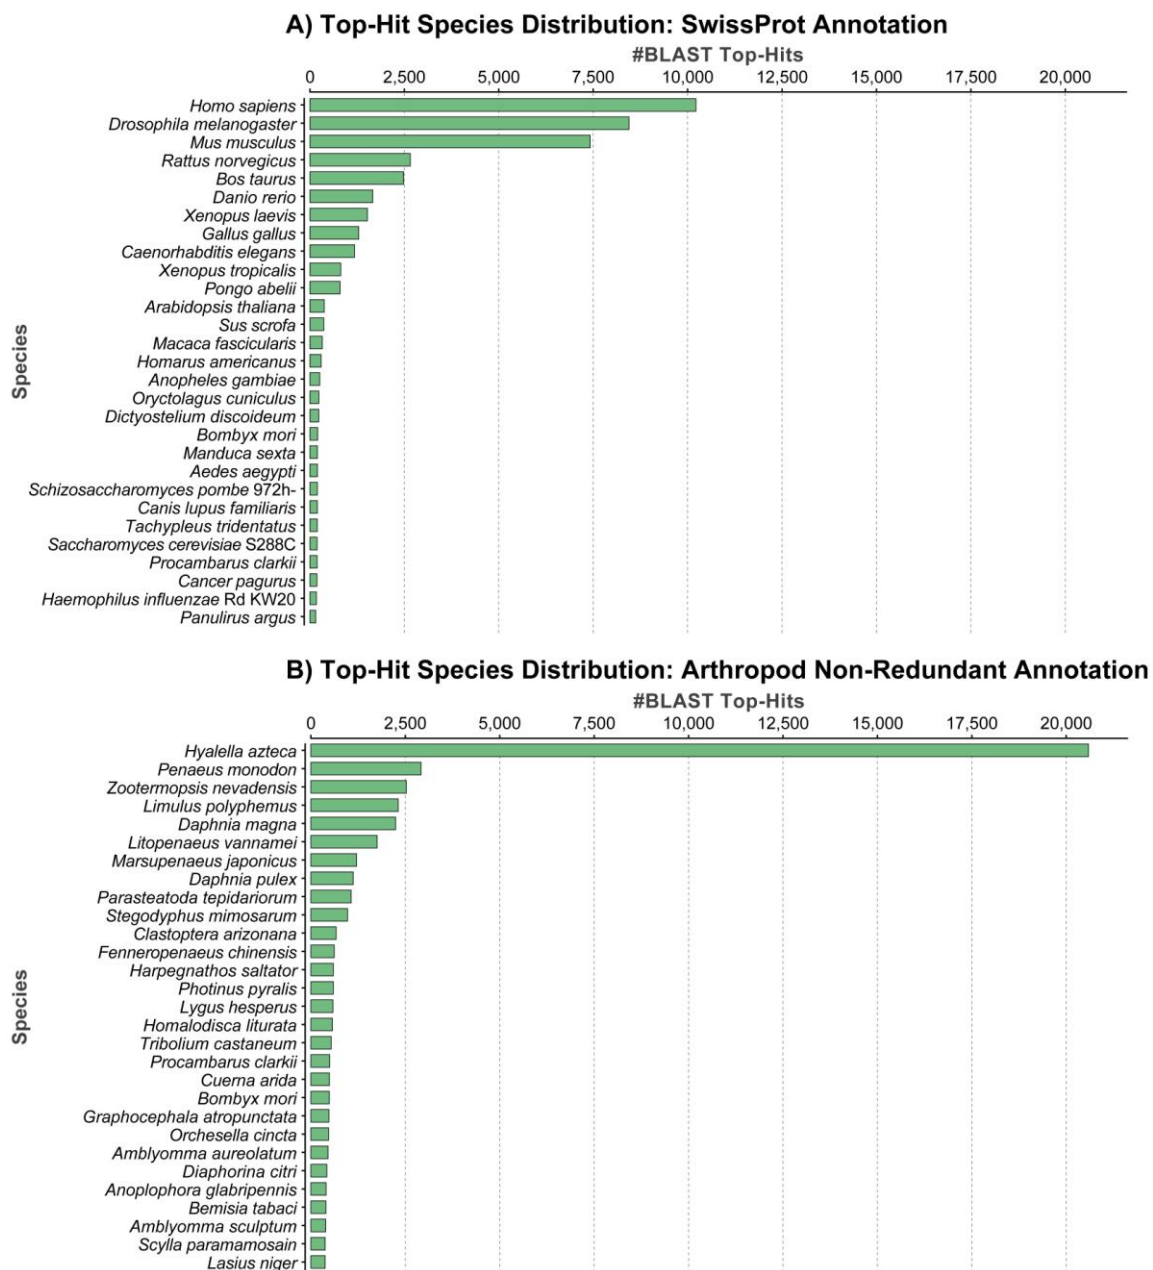

185 **Figure 1 | Species distribution of successfully annotated sequences across the top 29 species**  
 186 **using the SwissProt (A) and arthropod subsection of the non-redundant (B) database.**  
 187

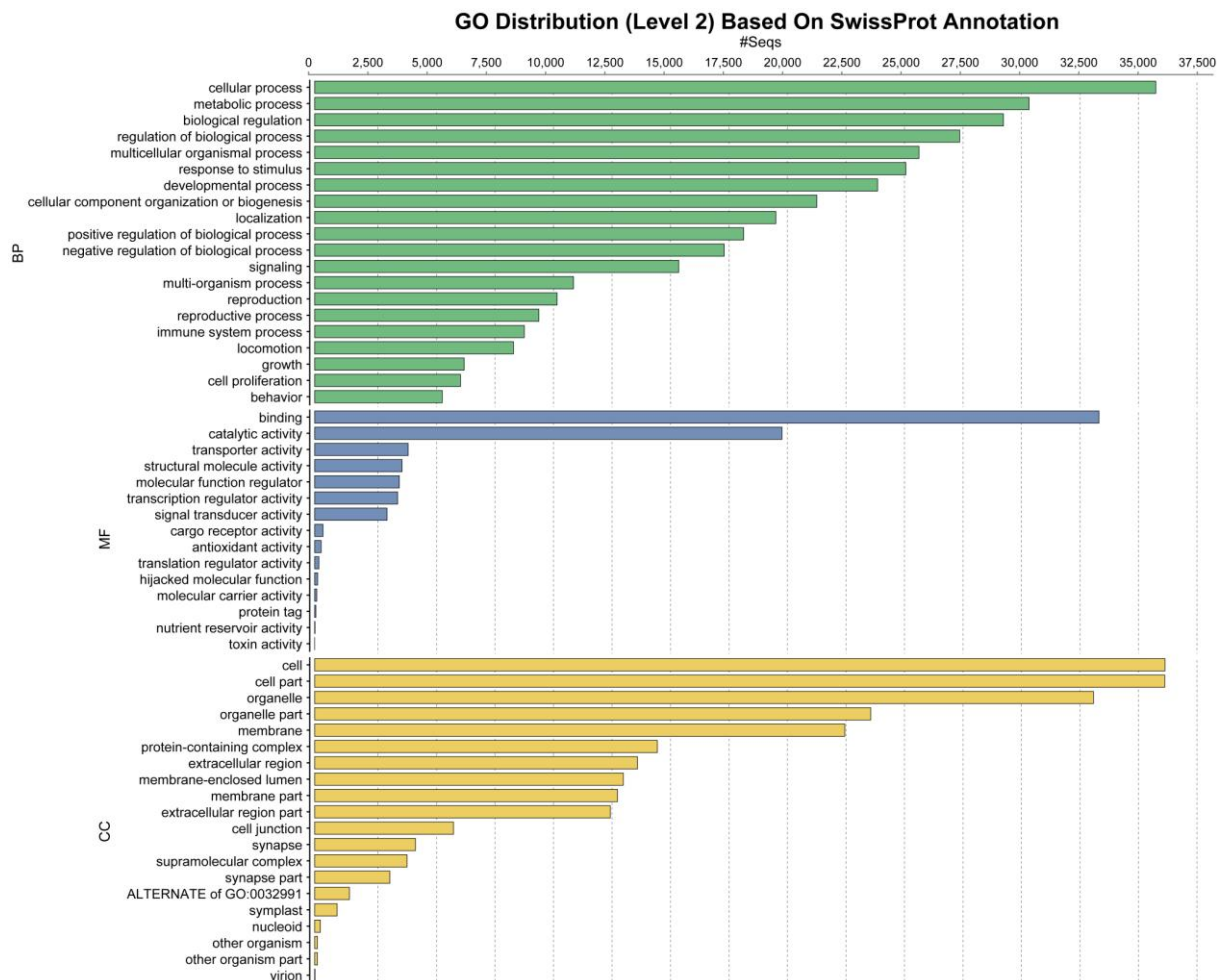

188  
189 **Figure 2 | Distribution of sequence annotations based on the SWISS-PROT database across**  
190 **the top 20 GO terms at level 2.** Determined across the entire dataset for Biological Process (BP,  
191 green), Molecular Function (MF, blue), and Cellular Component (CC, yellow).

192

### 193 **Sequence read mapping and differential gene expression analysis**

194 Using Bowtie2, 67.4% ± 4.8% (mean ± SD) of the paired reads successfully mapped  
195 to the transcriptome. Using corset for read counting and additional clustering, the  
196 initial 236,388 contigs were placed into 99,203 transcript clusters for the nine tissue  
197 types and 58,678 transcript clusters for the eight early life-history stages (larval and  
198 post-larval stage). A total of 176,966 contigs were used in the clustering of tissues  
199 and larvae, with 113,435 shared contigs, 8,188 contigs unique to larvae and 55,343  
200 contigs unique to adult tissues.

201 Different tissue types expressed between 9,939 and 12,255 transcript clusters  
202 (defined as > 50 normalized read counts per cluster), and between 17 and 316  
203 unique sets of transcript clusters (defined as a cluster with > 10 normalized read  
204 counts and < 10 normalized read counts in all other tissue types) (Table 3). The  
205 ability to annotate transcript clusters varied across tissue types (63.0% to 85.9%). In  
206 terms of unique tissue specific transcript clusters, hepatopancreas contained the  
207 largest number (316), followed by female gonad (161) and gill (153). Annotation

208 rates of these unique tissue-specific clusters were markedly lower (12.5% to 66.8%)  
 209 than with clusters shared across all tissue types (82.5% and 85.9%)

210 **Table 3 | Numbers of transcript clusters and cluster annotation rates across**  
 211 **transcriptomes determined for the nine adult *P. monodon* tissue types analysed.** Total  
 212 numbers of expressed clusters (>50 normalized read counts), uniquely expressed clusters  
 213 (normalized read count of >10 in a specific tissue, while having <10 read counts in all other  
 214 tissues) and constitutively expressed (> 50 normalized read counts in all) clusters within all  
 215 tissues in this study, and their relative annotation statistics. Numbers represent clusters  
 216 across all three respective tissue replicates. SP = SWISS-PROT database, nrA = non-  
 217 redundant Arthropod database.

| Tissue type    | Total expressed clusters |                      | Uniquely expressed clusters |                      |
|----------------|--------------------------|----------------------|-----------------------------|----------------------|
|                | Number                   | % Annotated (SP/nrA) | Number                      | % Annotated (SP/nrA) |
| Eyestalk       | 11,173                   | 67.3 / 72.8          | 31                          | 29.0 / 48.4          |
| Female Gonad   | 9,941                    | 74.3 / 79.7          | 161                         | 37.3 / 45.3          |
| Gill           | 12,255                   | 63.7 / 69.8          | 153                         | 30.7 / 39.2          |
| Haemolymph     | 10,577                   | 66.1 / 71.4          | 17                          | 23.5 / 29.4          |
| Hepatopancreas | 12,169                   | 67.7 / 73.9          | 316                         | 49.7 / 66.8          |
| Lymphoid Organ | 11,923                   | 63.0 / 68.5          | 24                          | 54.2 / 66.7          |
| Male Gonad     | 10,387                   | 71.9 / 77.5          | 71                          | 32.4 / 42.3          |
| Muscle         | 11,405                   | 66.9 / 72.4          | 77                          | 33.8 / 48.1          |
| Stomach        | 9,939                    | 68.6 / 73.7          | 24                          | 12.5 / 33.3          |
| Constitutive   | 4,300                    | 82.5 / 85.9          | -                           | -                    |

218

219 A principal component analysis (PCA) of the top 1,000 differentially expressed  
 220 transcripts across the nine adult tissue types showed strong clustering for most  
 221 tissue replicates, with the exception of stomach and eyestalk (Fig. 3A).  
 222 Haemolymph, female gonad and muscle formed distinct clusters separated from  
 223 other tissues, while eyestalk, gill, haemolymph, lymphoid organ, male gonad and  
 224 stomach tissues were much more closely associated and showed less distinct  
 225 clustering (Fig. 3A). A PCA of the top 500 differentially expressed transcripts across  
 226 the eight early life-history stages showed a strong separation within PC1, with  
 227 embryo and nauplii segregating substantially from the other early life-history larval  
 228 stages (Fig. 3B). PC1 explained an extraordinary 77% of the variance in transcript  
 229 clusters expressed across the different discrete larval stages, which appears to be  
 230 strongly associated with larval development leading from embryo to post-larval  
 231 stages.

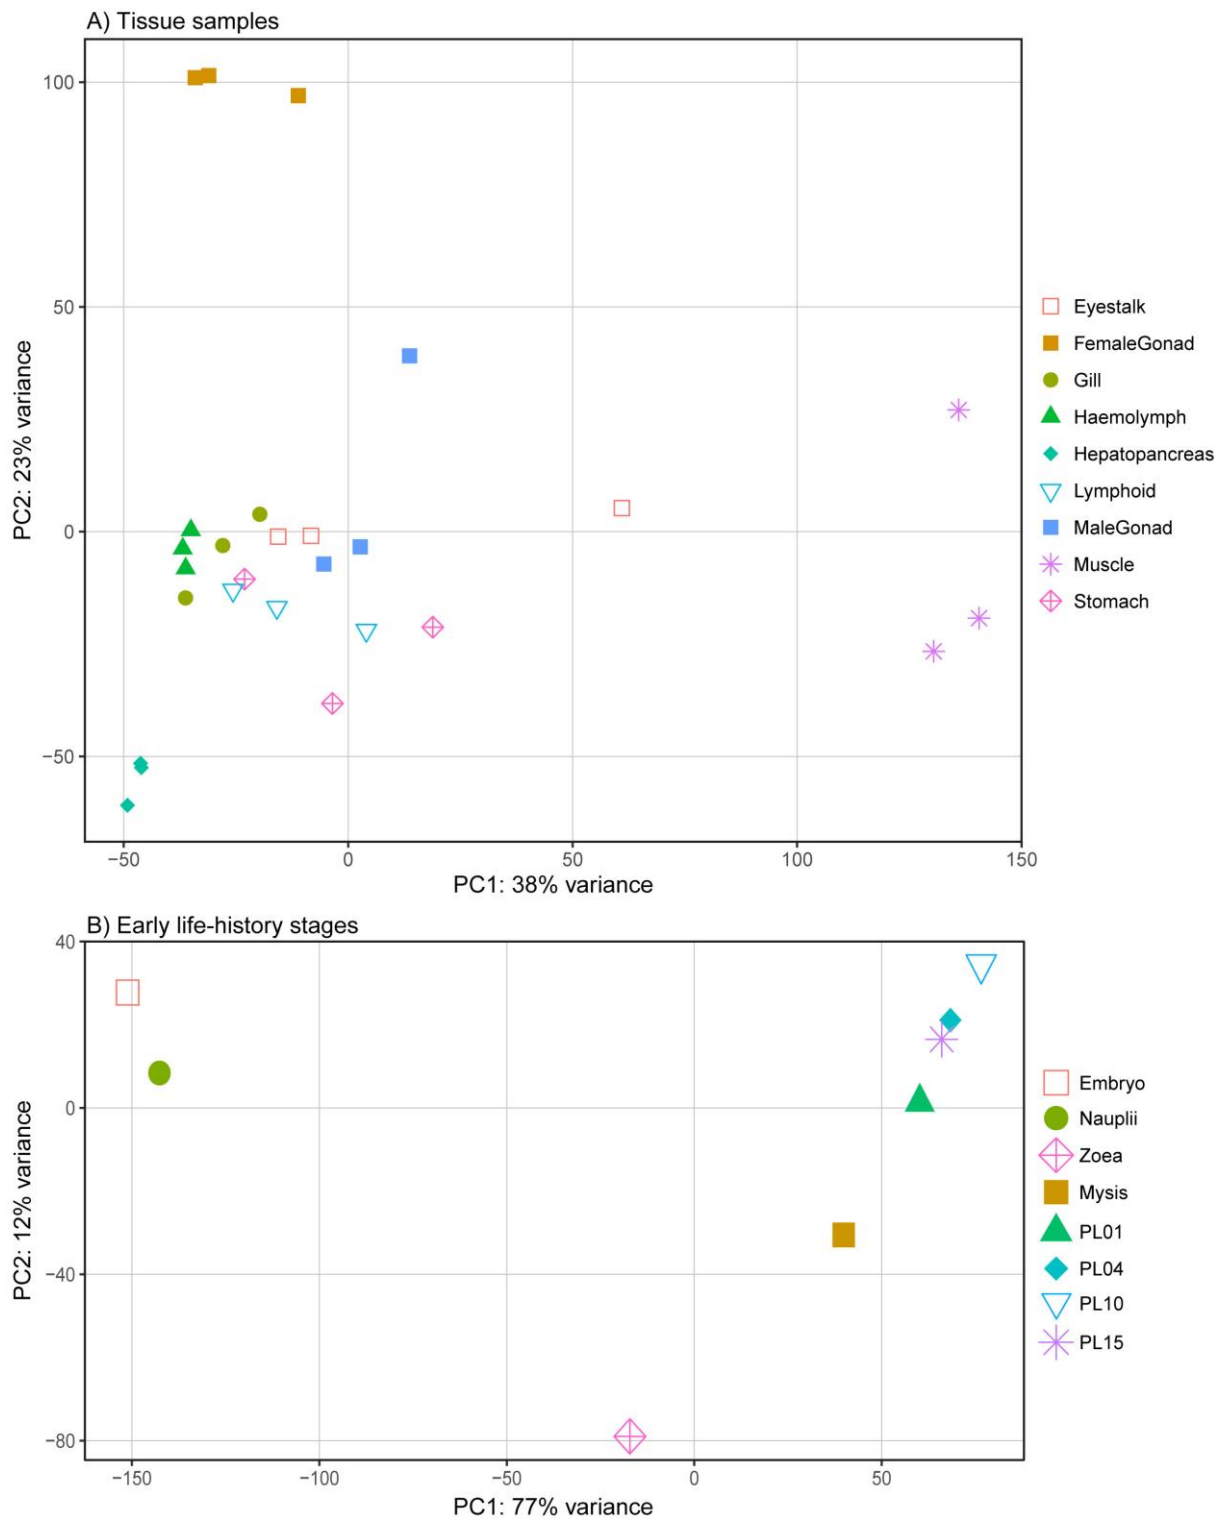

232 **Figure 3 | Principal component analysis showing the top most highly differentially expressed**  
 233 **transcripts of A) nine tissue types (top 1,000) and B) eight early life-history stages (top 500).**  
 234 PC = principal component, PL = post-larvae  
 235

236

237 The top 2,000 most variably expressed transcript clusters across all nine tissue types  
 238 clustered into nine distinct groups using Pearson's correlation (Fig. 4). These groups  
 239 aligned broadly with expression patterns identified to be unique to each tissues type.  
 240 For example, group two comprised 208 clusters highly expressed in female gonad,  
 241 which were mostly successfully annotated (81.8%) using the nrA database.

242 Annotated transcripts included farnesoic acid O-methyltransferase (FAmET),  
 243 phosphoenolpyruvate carboxykinase (PEPCK), glutathione peroxidase (GPx) and  
 244 nasrat. Transcripts in each cluster and their annotation are detailed in  
 245 Supplementary Table 2. Group four consisted of clusters expressed mainly in male  
 246 gonad that were annotated relatively poorly (38.7%) with many (35.5%) not  
 247 expressed in the early life-history stages (Table 4). Group nine was the largest and  
 248 comprised 591 clusters that were mostly annotated (86.0%) and expressed  
 249 predominantly in muscle tissue. Group seven consisted of 533 clusters that were  
 250 also mostly annotated (85.7%) and expressed predominantly in hepatopancreatic  
 251 tissue. Except for male gonad, most clusters expressed in adult tissue types were  
 252 also expressed in the early life-history stages.

253 **Table 4 | Groupings of the top 2,000 highly variably expressed transcript clusters**  
 254 **among all nine adult tissue types based on Pearson's correlation.** This includes  
 255 annotation success and tissue type where each group was predominantly expressed, and the  
 256 percent of clusters in each group found in adult tissue types but not in the larval stages  
 257 examined.

| Groups | Predominant tissue type expression site | Number of clusters | % Annotated (SP/nrA) | % in adult but not larval tissues |
|--------|-----------------------------------------|--------------------|----------------------|-----------------------------------|
| 1      | Lymphoid Organ                          | 81                 | 64.2% / 76.5%        | 0.0%                              |
| 2      | Haemolymph                              | 139                | 63.3% / 84.9%        | 1.4%                              |
| 3      | Female Gonad                            | 208                | 55.3% / 81.7%        | 6.7%                              |
| 4      | Gill                                    | 177                | 53.1% / 66.1%        | 3.4%                              |
| 5      | Stomach                                 | 72                 | 62.5% / 68.1%        | 8.3%                              |
| 6      | Male Gonad                              | 124                | 29.0% / 38.7%        | 35.5%                             |
| 7      | Hepatopancreas                          | 533                | 66.6% / 85.7%        | 0.8%                              |
| 8      | Eyestalk                                | 75                 | 66.7% / 73.3%        | 1.3%                              |
| 9      | Muscle                                  | 591                | 75.1% / 86.0%        | 1.5%                              |
| all    | -                                       | 2000               | 64.0% / 84.6%        | 4.3%                              |

258 SP = SWISS-PROT database, nrA = non-redundant Arthropod database

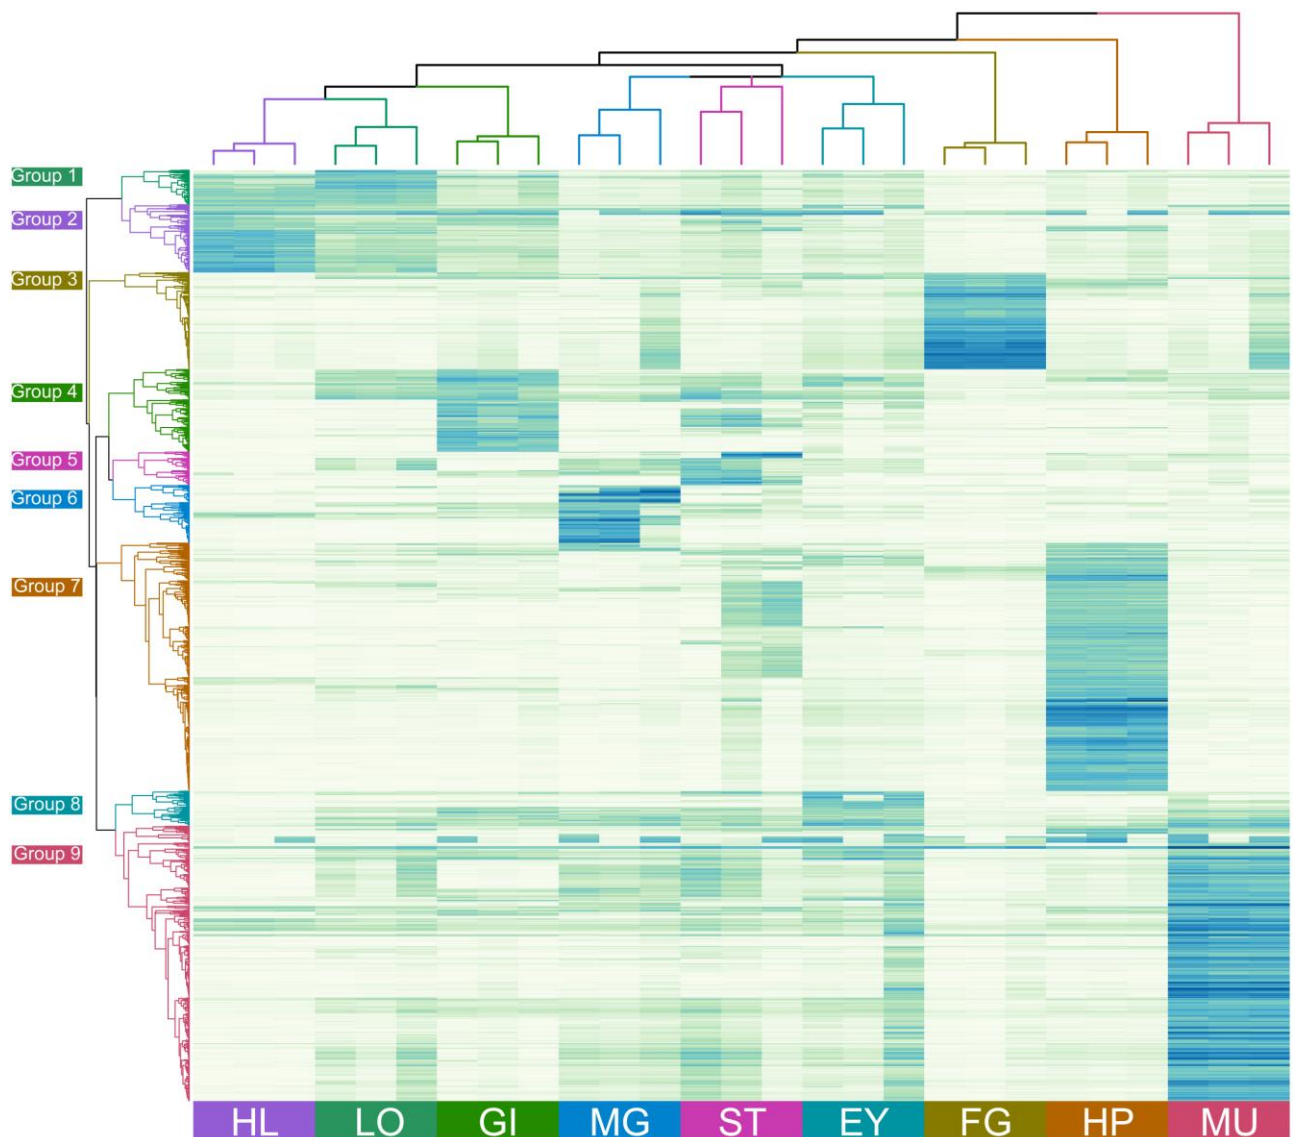

259  
260  
261  
262  
263  
264  
265

**Figure 4 | Heatmap and hierarchical grouping of the top 2,000 differentially expressed genes in the nine different tissue types.** Gene expression patterns (rows) were grouped into nine expression groups based on Pearson's correlation and the three replicates of each tissue type (columns) into nine tissue groups based on Euclidean distance. EY – eyestalk; FG – female gonad; GI – gill; HL – hemolymph; HP – hepatopancreas; LO – lymphoid organ; MG – male gonad; MU – muscle; ST – stomach.

266

267 The same top 500 most variably expressed transcript clusters in the different larval  
268 and post-larval stages used for the PCA broadly clustered into nine distinct groups  
269 based on Pearson's correlation (Fig. 5). Irrespective of the annotation success, the  
270 analysis identified transcript clusters that shared similar expression patterns across  
271 developmental stages. Embryos and nauplii expressed a set of genes that were not  
272 expressed during any other developmental stage (groups 7 and 8). Of the 140 genes  
273 expressed exclusively within the embryo and nauplii stages (group 8), only 24.3%  
274 and 37.1%, respectively, were annotated successfully using the SWISS-PROT or  
275 nrA databases (Table 5). Of the transcript clusters that were annotated, 13 encoded  
276 orthologs of the neurotrophic factor *spatzle* and another 13 encoded orthologs of

277 cuticular proteins. Transcripts in each cluster and their annotation are detailed in  
 278 Supplementary Table 3. Two large clusters of genes were expressed from zoea  
 279 throughout each subsequent stage (group 1), or from mysis throughout each  
 280 subsequent stage (group 4). A high percentage (61.2% and 83.1%) of transcripts in  
 281 these two clusters was annotated. Since each larval stage was sequenced as a pool  
 282 of individuals, differential gene expression (DGE) analysis could not be performed.

283 **Table 5 | Groupings of the top 500 highly variably expressed transcript clusters among the**  
 284 **four larval and four post-larval stages based on Pearson's correlation.** This includes annotation  
 285 success, stages in which transcript groups were predominantly expressed and the percent of clusters  
 286 in each group found in larval stages, but not in the adult tissue types examined.

| Groups | Stage(s) with predominant expression            | Number of clusters | % Annotated (SP/nrA) | % unique to larvae |
|--------|-------------------------------------------------|--------------------|----------------------|--------------------|
| 1      | Mid larval to PL (Z, M, PL01, PL04, PL10, PL15) | 77                 | 75.3 / 83.1          | 9.1                |
| 2      | Mid Larval (Z, M)                               | 35                 | 42.9 / 68.6          | 62.9               |
| 3      | Mid PL (PL4, PL10)                              | 12                 | 0.0 / 25.0           | 33.3               |
| 4      | Late larval to PL (M, PL1, PL4, PL10, PL15)     | 152                | 61.2 / 69.7          | 18.4               |
| 5      | PL15                                            | 13                 | 69.2 / 92.3          | 76.9               |
| 6      | Late PL (PL4, PL10, PL15)                       | 38                 | 84.2 / 84.2          | 10.5               |
| 7      | Embryo (E)                                      | 12                 | 0.0 / 16.7           | 58.3               |
| 8      | Early larval (E, N)                             | 140                | 24.3 / 37.1          | 85.0               |
| 9      | Larval (E, N, Z, M, PL15)                       | 21                 | 33.3 / 61.9          | 38.1               |
| Total  |                                                 | 500                | 49.6 / 61.6          | 50.4               |

287 SP = SWISS-PROT database, nrA = non-redundant Arthropod database, E = embryo, N = nauplii, Z =  
 288 zoea, M = mysis, PL = post larvae (day)

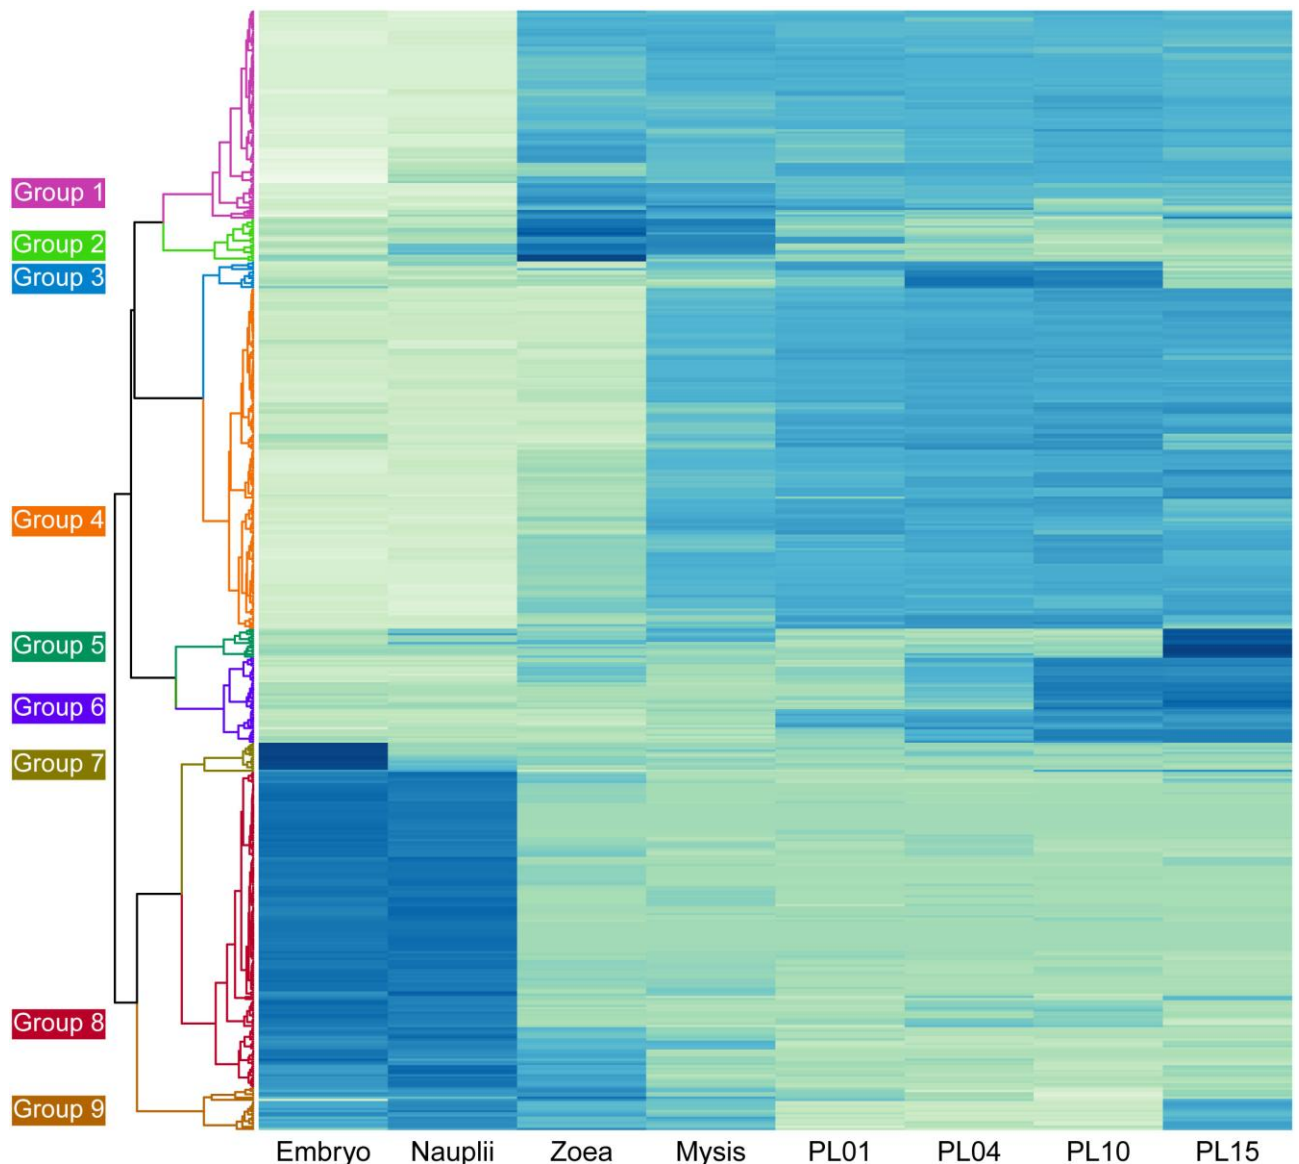

289  
290 **Fig. 5 | Heatmap and hierarchical grouping of the top 500 differentially expressed genes in the**  
291 **eight larval and post-larval stages examined.** Gene expression patterns in each larval/post-larval  
292 stage (row) were grouped into nine expression groups based on Pearson's correlation.

293

### 294 ***Identification of long non-coding RNAs***

295 We used the set of 1,047 complete USCOs as the training set for classification of  
296 coding and non-coding transcripts. It was determined that a coding potential of  
297 0.2642 was the appropriate threshold to balance classification specificity and  
298 sensitivity. In total 79,656 transcripts were classified as lncRNAs and the remaining  
299 154,893 transcripts were classified as mRNAs.

300 Comparing the lncRNA annotation with the BLASTx annotation, out of the 236,388  
301 contigs 67,960 were uniquely identified as lncRNA, while 13,535 contigs were  
302 annotated both as mRNA and lncRNA. At a cluster level, 12,079 out of 58,768 larval  
303 clusters (22.6%) and 23,645 out of the 99,203 tissue clusters (23.8%) were uniquely



304 annotated as lncRNA. Detailed results of the lncRNA analysis can be found in  
 305 Supplementary Table 4.

306 **KEGG pathway analysis**

307 Annotated contigs were overlaid onto their respective biological pathways using the  
 308 Kyoto Encyclopaedia of Genes and Genomes (KEGG) pathways. Genes involved in  
 309 general eukaryotic cellular processes such as RNA replication (Fig. 6) and basal  
 310 transcription factor sequences (Fig. 7) were well represented in the *P. monodon*  
 311 transcriptome. As expected, assignments to KEGG pathways in prokaryotes were  
 312 rare, as were ribosomal RNA assignments. The various biological processes,  
 313 metabolism and signalling cascades comprising all 235 KEGG pathways to which  
 314 transcripts were assigned are detailed in Supplementary Table 5.

RNA POLYMERASE

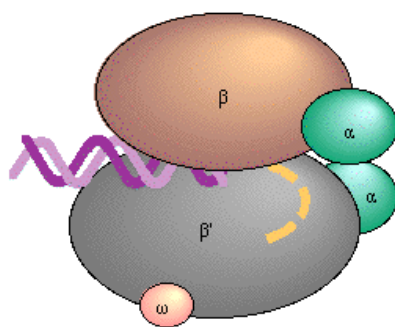

RNA polymerase (*Thermus aquaticus*)

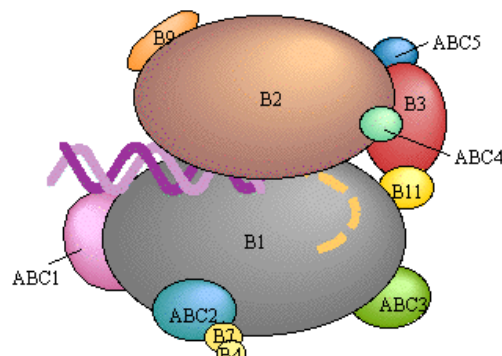

RNA polymerase II (*Saccharomyces cerevisiae*)

Bacterial

|          |          |          |          |
|----------|----------|----------|----------|
| $\beta$  | $\alpha$ | $\omega$ | $\delta$ |
| $\beta'$ |          |          |          |

Archaeal

|   |   |   |   |   |   |
|---|---|---|---|---|---|
| B | D | F | H | K | E |
| A | G |   | N | L | P |

Eukaryotic Pol II

|               |     |
|---------------|-----|
| Core subunits |     |
| B2            | B3  |
| B1            | B11 |

Pol II specific subunits

|    |    |    |
|----|----|----|
| B4 | B7 | B9 |
|----|----|----|

Pol I, II, and III common subunits

|      |      |      |
|------|------|------|
| ABC1 | ABC2 | ABC3 |
| ABC4 | ABC5 |      |

Eukaryotic Pol III

|               |     |
|---------------|-----|
| Core subunits |     |
| C2            | AC2 |
| C1            | AC1 |

Pol III specific subunits

|     |     |     |
|-----|-----|-----|
| C3  | C4  | C11 |
| C25 | C31 | C34 |
| C37 |     |     |

Eukaryotic Pol I

|               |     |
|---------------|-----|
| Core subunits |     |
| A2            | AC2 |
| A1            | AC1 |

Pol I specific subunits

|     |     |     |
|-----|-----|-----|
| A12 | A14 | A34 |
| A49 | A43 |     |

315

316 **Fig. 6 | Presence of mRNA contigs that encode for RNA polymerase subunits based on KEGG**  
 317 **pathway analysis.** Green shading highlights the presence of gene orthologs in the *P. monodon*  
 318 transcriptome.

319

BASAL TRANSCRIPTION FACTORS (EUKARYOTES)

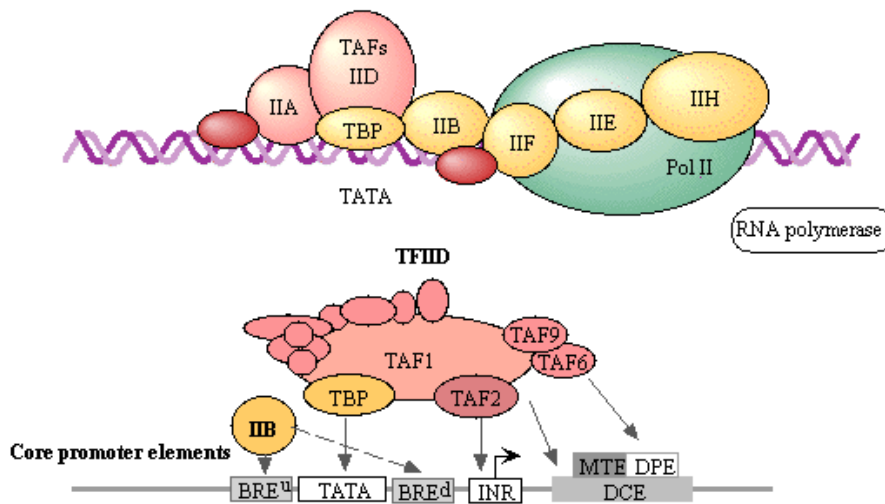

General transcription factors for RNA polymerase II

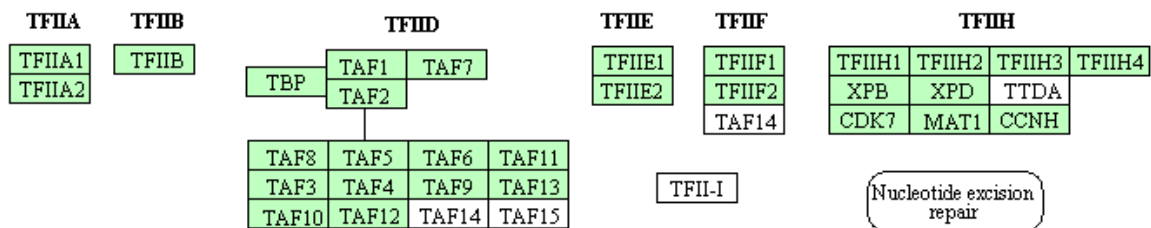

320

321 **Fig. 7 | Presence of eukaryotic basal transcription factor sequences based on KEGG pathway**  
 322 **analysis.** Green shading highlights the presence of gene in the *P. monodon* transcriptome.

323

324 **Virus discovery**

325 Interrogating the *P. monodon* transcriptome against the viral subsection of the non-  
 326 redundant database using BLASTx assigned viral annotations to 12,744 contigs.  
 327 Detailed information on the viral blast can be found in Supplementary Table 6.  
 328 Closer inspection of the data identified the vast majority (>99.8%) of these to  
 329 represent short motifs conserved between eukaryote cell proteins and related  
 330 homologs viruses with generally large and complex DNA genomes such as giant  
 331 viruses, poxviruses, herpes viruses and baculoviruses. Additional BLASTx searches  
 332 of the GenBank nr database using representative contigs confirmed them to be or  
 333 likely be endogenous shrimp gene transcripts. The remaining 21 contigs had Top Hit  
 334 E-value scores identifying them to be related most closely to strains of Gill-  
 335 associated virus (GAV; 4 contigs, longest 26,235 nt), *Penaeus chinensis*  
 336 hepadenovirus (*Pch*HDV; 4 contigs, longest 1,884 nt), Wenzhou shrimp virus 2  
 337 (WSV2; RdRp, hypothetical protein and G protein contigs, longest 6,891 nt),  
 338 Deformed wing virus (DWV; 10,133 nt), Wenzhou shrimp virus 8 (WSV8; 6 contigs,

339 longest 4,579 nt), Beihai picorna-like virus 2 (5,277 nt), Wenzhou picorna-like virus  
340 23 (551 nt) and Moloney murine leukaemia virus Pr180 sequence (Mo-MuLV; 2,431  
341 nt). Lastly, over 1200 contigs with homology to phages were detected, some of  
342 which related to phage tail protein and tetracycline resistance.

343

## 344 **Discussion**

345 Here we report a comprehensive black tiger shrimp (*Penaeus monodon*)  
346 transcriptome assembled from nine tissues, four larval stages and four post-larval  
347 stages. The transcriptome was generated to expand the genetic resources available  
348 for this species to help investigate the genetic basis behind larval developmental  
349 stage transitions and tissue functioning, as well as traits with potential to be exploited  
350 commercially for the aquaculture of this and other shrimp species. The aim was  
351 therefore to generate a highly complete *P. monodon* transcriptome at the risk of it  
352 containing higher levels of transcript redundancy. This was confirmed by BUSCO  
353 results which demonstrated the transcriptome to be highly complete (C: 98.2%) with  
354 low fragmentation (F: 0.8%) or missing (M: 1.0%) genes but high levels of duplication  
355 (D: 51.3%). These assembly statistics are comparable to those obtained by a  
356 transcriptome assembly from *L. vannamei*<sup>15</sup> (C: 98.0%, F: 0.7%, M: 1.3%, D: 25.5%),  
357 but greatly exceeded those of another *P. monodon* assembly focussing on gonadal  
358 tissue recently made available publicly<sup>10</sup> (C: 33.7%, F: 44.9%, M: 21.4%, D: 6.8%).  
359 As other recent NGS analyses of *P. monodon* have focussed on only one or two  
360 tissue types without including any larval stages or biological replicates, generated  
361 fewer total reads, or experienced data loss due to quality trimming of low quality  
362 reads or low mapping efficiencies<sup>8-11</sup>, these are likely to have missed many  
363 transcripts. In contrast, the sequencing and assembly strategy used here covered  
364 more tissue types at greater read depth and employed multiple *de novo* assembly  
365 tools to reduce assembler bias.

## 366 ***Functional annotation and comparative analysis***

367 Using the nrA database, 30.0% of transcript clusters found in the nine tissue types  
368 and 38.1% of transcript clusters found in the eight larval/post-larval stages analysed  
369 were successfully annotated. These annotation levels were comparable to those  
370 reported to date in similar studies on different crustaceans<sup>8,15,24,50</sup>. While transcript  
371 cluster annotation levels were lower using the SWISS-PROT database compared to  
372 the nrA database, the percentage of successful GO-term assignments was  
373 substantially higher. In addition to the annotations, analyses were undertaken to  
374 identify transcript clusters expressed differentially across tissue types or early life-  
375 history stages, irrespective of successful annotation. The identification was done to  
376 help provide initial evidence for transcript roles in specific tissue functions or

377 developmental transitions. Despite all efforts made here to improve transcript  
378 annotation levels for *P. monodon*, our data reaffirms the need for dedicated  
379 functional studies to assign or confirm gene functions of both annotated and  
380 unannotated transcript clusters of non-model (crustacean) species.

381 To our best knowledge, to date only two Penaeid shrimp transcriptome assemblies  
382 have been made publicly available<sup>10,15</sup>, restricting comparative analyses of these  
383 transcriptomes. A reciprocal MegaBLAST identified 96.8% of the most recent *P.*  
384 *monodon* assembly<sup>10</sup> within the transcriptome described here, but only 40.0% of our  
385 assembly was found in the earlier assembly. These comparisons confirm that our  
386 transcriptome assembly contains many high quality *P. monodon* transcripts not  
387 discovered previously.

388 When compared across species, a reciprocal MegaBLAST showed that the  
389 transcriptomes of *P. monodon* (present) and *L. vannamei*<sup>15</sup> shared approximately  
390 48% of contigs. Since the assembly metrics of the *L. vannamei* transcriptome were  
391 similar to those of our *P. monodon* transcriptome, the low number of shared contigs  
392 could stem from considerable differences in transcript type or sequence composition  
393 between the two shrimp species. As comprehensive comparisons across crustacean  
394 species is currently impractical due to restrictions on publicly-available transcriptome  
395 assemblies, the potential value of this warrants effort to consolidate transcriptomic  
396 data and to establish both centralized and species-specific databases.

### 397 ***Tissue specific expression***

398 Read count data identified independent clusters of transcripts expressed uniquely  
399 within different tissues and clusters that formed distinct groups based on their tissue-  
400 specific expression patterns. An important consideration for this type of analysis is  
401 the normalized read count cutoff value for each cluster to be considered “unique”,  
402 which was arbitrarily set at above 10 in a specific tissue and < 10 in all others. At  
403 >100 normalized read counts, only approximately half of the assigned unique  
404 clusters were retained, indicating that the expression levels of many of these  
405 potentially tissue-specific clusters was relatively low. Among the annotated transcript  
406 clusters most highly expressed in female gonad tissue were FAMeT, PEPCK, GPx  
407 and nasrat. Functional roles these proteins may play range from the shrimp moult  
408 cycle and reproduction<sup>51</sup>, the primary step of gluconeogenesis<sup>52</sup>, preventing  
409 oxidative stress<sup>52</sup>, to specifying terminal regions of the embryo<sup>53</sup>. Among the  
410 annotated genes expressed most highly in eyestalk tissue was hyperglycaemic  
411 hormone (CHH), a key neuropeptide hormone that regulates blood sugar, moulting  
412 and reproduction<sup>54</sup>. A subset of transcript clusters highly expressed in lymphoid  
413 organ tissue was also highly expressed in gill tissue, most likely due to high  
414 concentrations of haemocytes within both tissue types. The majority of genes  
415 expressed most highly in hepatopancreas were annotated, potentially reflecting the

416 shared metabolic functions of this organ with those of other animals. Also of much  
417 interest were the non-annotated transcripts expressed uniquely in specific tissue  
418 types. For example, transcript clusters expressed highly in male gonad were poorly  
419 annotated by both databases and included a large proportion of clusters, annotated  
420 or not, expressed exclusively in adult tissue types, indicating that male reproductive  
421 organs utilize many genes that remain poorly characterized. The grouping of genes  
422 with similar expression patterns broadly categorized these transcript clusters into  
423 potential functional groups within each tissue type, thereby guiding the selection for  
424 more targeted molecular function analyses.

#### 425 ***Larval and post-larval development***

426 Based solely on gene expression patterns, the transcriptome data identified unique  
427 groups of transcripts involved in transitions between *P. monodon* early life-history  
428 stages. There was a major disparity between the annotation success of transcript  
429 groups upregulated in early or late stage embryogenesis, highlighting how poorly  
430 early developmental pathways have been characterized in crustaceans. Also of  
431 significance was the presence of orthologs of the *Spatzle* gene, known in  
432 *Drosophila* flies to establish the dorso-ventral patterning of the early embryo<sup>55</sup> among  
433 transcript clusters detected consistently across later larval and post-larval stages.  
434 Since each larval and post-larval stage sequenced comprised a pool of several  
435 hundred individuals, quantitative and/or spatial transcript expression patterns would  
436 be required to draw further functional conclusions. Nevertheless, the data reported  
437 here will benefit from similar data on other shrimp and crustacean species,  
438 particularly for transcript clusters expressed exclusively in embryo with no significant  
439 homology to currently known genes.

#### 440 ***Identification of long non-coding RNAs***

441 Long non-coding RNAs (lncRNA) are a type of transcript that have many common  
442 features with traditional coding mRNA, including 5' capping, splicing and 3'  
443 polyadenylation<sup>56-58</sup>. The nature of lncRNAs is still poorly understood, and it is likely  
444 that lncRNAs are in fact a heterogeneous group of transcripts with regulatory  
445 functions that are not actively translated into proteins<sup>59</sup>. Thus, their main  
446 characteristics are the lack of open reading frames (ORFs) or the presence of non-  
447 canonical ORFs in the mature transcript. The biological roles of lncRNAs range from  
448 regulation of gene expression, and control of translation, to imprinting. As such, they  
449 have been linked to X chromosome inactivation in humans<sup>60</sup>, genomic imprinting<sup>61</sup>  
450 and cancer<sup>62,63</sup>.

451 Due to the lack of a known lncRNA database in shrimp that can be used for their  
452 identification, we used FEELnc which scores each transcript according to its coding  
453 potential and then selects a threshold score to classify the transcripts into coding or

454 non-coding<sup>45</sup>. This software is particularly useful for non-model species because in  
455 the absence of an lncRNA training set, it generates a simulated training set using  
456 debris from high confidence coding transcripts. In fly data, this approach showed an  
457 MCC value of 0.754 with an accuracy of 0.868<sup>45</sup>.

458 In this study, 79,656 transcripts were classified as lncRNAs, of which 67,960 (85.3%)  
459 could not be aligned to any protein database. As expected, the use of a non-model  
460 organism and the lack of a set with known lncRNA for training led to the ambiguous  
461 classification of 13,535 transcripts with low protein-coding potential but clear  
462 alignments to known proteins in curated databases. Classification of these  
463 transcripts is the first step towards understanding their roles in the development and  
464 regulation of gene expression in *Penaeus monodon*.

### 465 **KEGG pathways**

466 Annotated transcript clusters mapped into 235 KEGG pathways (Supplementary  
467 Table 3), which have been broadly classified into functional groupings such as  
468 general metabolism (e.g. TCA cycle, xenobiotic metabolism, immunity, reproduction),  
469 nutritional metabolism (e.g. proteins, lipids, carbohydrates, vitamins), cellular  
470 processes (e.g. DNA replication, protein trafficking, apoptosis), biological processes  
471 (e.g. circadian rhythm, olfaction and taste, digestion and absorption) and signalling  
472 pathways (e.g. PI3K-Akt, MAPK, axis formation, TGF-beta). In general, core  
473 pathways such as citrate cycle, oxidative phosphorylation, ribosome biogenesis and  
474 RNA/DNA polymerases were better represented than more specific pathways such  
475 as the pentose and glucuronate interconversion pathway, or the ascorbate and  
476 aldarate metabolism pathway. Furthermore, arthropod specific pathways were  
477 generally better represented. For example, the general circadian rhythm pathway  
478 was missing several homologs, while the fly specific circadian rhythm pathway was  
479 complete. This could be explained by transcripts not sharing sufficient homology with  
480 the known genes used for the KEGG analysis and therefore failing to be annotated.  
481 Particularly for those pathways highly-conserved among other eukaryotes, the  
482 existence of unique transcripts suggests that Penaeid shrimp and possibly  
483 crustaceans in general might use metabolic mechanisms differing from eukaryote  
484 species studied to date. Their existence also highlights the need for high-quality  
485 genome assemblies for shrimp and other crustacean species, overlaid with isoform,  
486 tissue-specific and developmental stage transcript expression data, to either help  
487 predict gene functions or direct gene knockdown studies, using RNA interference  
488 processes as an example, to empirically ascribe functions to novel genes.

### 489 **Virus discovery**

490 Several RNA transcripts and/or genome sequences likely to be from viruses were  
491 discovered in the *P. monodon* transcriptome. This was not unexpected considering

492 that it was generated from multiple individuals, tissue types and larval/post-larval  
493 stages, as shrimp are co-infected commonly with multiple viruses and as there are  
494 several viruses known to be endemic in *P. monodon* populations indigenous to  
495 different regions of Australia<sup>64-67</sup>. The presence of near full-length ssRNA genome  
496 sequences for viruses such as gill-associated virus (GAV, 26,235 nt) and white spot  
497 virus 2 (WSV2, 10,542 nt) provided additional validation of the methods used to  
498 synthesize and assemble the transcriptome, and to its completeness as  
499 demonstrated by various metrics measuring the nature and number of endogenous  
500 gene transcripts. The detection of a ssDNA virus, hepadenovirus, within the  
501 transcriptome, presumably detected in a replicative phase, indicates the application  
502 of this technique as a tool to also detect the presence of viruses with DNA genomes.

503 In addition to known endemic viruses, the transcriptome contained full-length or near  
504 full-length RNA transcripts related closely to the recently-described shrimp viruses  
505 WSV2 and WSV8<sup>68,69</sup> unknown until now to occur in Australian *P. monodon*.  
506 Moreover, it contained a long transcript (10,133 nt) 95.0% identical to the full-length  
507 ssRNA genome of deformed wing virus (DWV), a virus of Varroa mites that is  
508 transmitted to honeybees<sup>70</sup>, and one of a rapidly expanding number of *Iflavirus*  
509 species now being discovered in diverse insect species also including beetles,  
510 wasps, caterpillars and moths<sup>71</sup>. As essentially all DWV-like genome sequence reads  
511 in this study originated from the stomach of a single individual shrimp, they were  
512 potentially derived from a virus-infected honeybee or mite-infested honeybee  
513 ingesting by this shrimp. While honeybees infested with Varroa mites have been  
514 detected recently in North Queensland not far from where the shrimp was  
515 collected<sup>72</sup>, DWV itself has not been detected in a comprehensive recent study<sup>73</sup>.  
516 The present study therefore represents the first detection of a DWV-like genome in  
517 Australia, although the origin remains unknown. This reinforces both the strength of  
518 the technology in detecting unknown pathogens and also the potential difficulty in  
519 interpretation of transcriptome results.

520 A couple of long transcripts of suspected viral origin and expressed across multiple  
521 tissue types were also identified. One of these possessed significant BLASTx  
522 homology to the reverse transcriptase (RT)-like component of hypothetical protein 1  
523 of Beihai picorna-like virus 116 discovered recently in blue swimmer crabs (*Portunus*  
524 *pelagicus*)<sup>69</sup>. The other possessed substantial homology to the RT component of the  
525 Mo-MuLV Pr180 polyprotein and was expressed across all tissue types except the  
526 lymphoid organ, suggesting it to be from a mobile element such as a poly(A)-type  
527 retrotransposon or retrovirus<sup>74</sup>. However, determining whether these transcripts  
528 containing RT sequences are viral in origin, or represent the products of endogenous  
529 retrotransposons like others now being reported in shrimp<sup>75</sup> will require further  
530 investigation, as will the nature of the strains, host and distribution ranges,

531 prevalence and potential pathogenicity of the new viruses discovered in the  
532 transcriptome.

### 533 **Conclusions**

534 This study describes the assembly of a comprehensive and high quality  
535 transcriptome from nine different tissue types, and eight larval and post-larval early  
536 life-history stages of the black tiger shrimp, *Penaeus monodon*. It also summarizes  
537 the number and nature of specific transcript clusters differentially expressed in  
538 different tissue types and larval stages, and the Clusters were functionally annotated  
539 and mapped to 235 KEGG pathways. Unique transcript clusters and cluster groups  
540 were defined across distinct tissues and early life-history stages, providing initial  
541 evidence for their roles in specific tissue functions or developmental transitions. The  
542 current transcriptome provides a valuable resource for further investigation of  
543 directing gene-function studies to increase basic functional biology knowledge in  
544 shrimp and for investigating molecular basis of traits of relevance to the aquaculture  
545 of shrimp. While the current transcriptome already provides an improved resource for  
546 *P. monodon*, further effort is required using long-read sequencing data, such as  
547 provided by PacBio, to better resolve genes at isoform level. Lastly, this high-quality  
548 *de novo* assembly and data set are publically available and will hopefully support  
549 research projects that underpin transformational advances in how we culture shrimp  
550 globally.

551

### 552 **Acknowledgements**

553 We thank Andrew Foote, Gopala Krishna, Sarah Berry and Tansyn Noble for  
554 assistance in organizing and collecting tissue samples. Research Funding for this  
555 project was from the Australian Research Council Industrial Transformation  
556 Research Program IH130200013.

557

### 558 **References**

- 559 1 FAO. Fisheries and Aquaculture topics. The State of World Fisheries and Aquaculture  
560 (SOFIA) (Food and Agriculture Organization United Nations, 2016).
- 561 2 Gjedrem, T., Robinson, N. & Rye, M. The importance of selective breeding in aquaculture to  
562 meet future demands for animal protein: a review. *Aquaculture* **350**, 117-129 (2012).
- 563 3 Jones, D. B. *et al.* A comparative integrated gene-based linkage and locus ordering by  
564 linkage disequilibrium map for the Pacific white shrimp, *Litopenaeus vannamei*. *Scientific*  
565 *Reports* **7** (2017).
- 566 4 Wang, Z., Gerstein, M. & Snyder, M. RNA-Seq: a revolutionary tool for transcriptomics.  
567 *Nature reviews genetics* **10**, 57-63 (2009).
- 568 5 Saha, S. *et al.* Using the transcriptome to annotate the genome. *Nature biotechnology* **20**,  
569 508-512 (2002).



- 570 6 Yu, Y. *et al.* SNP discovery in the transcriptome of white Pacific shrimp *Litopenaeus*  
571 *vannamei* by next generation sequencing. *PLoS One* **9**, e87218 (2014).
- 572 7 Song, L., Shankar, D. S. & Florea, L. Rascaf: Improving Genome Assembly with RNA  
573 Sequencing Data. *The Plant Genome* doi:10.3835/plantgenome2016.03.0027 (2016).
- 574 8 Nguyen, C. *et al.* De novo assembly and transcriptome characterization of major growth-  
575 related genes in various tissues of *Penaeus monodon*. *Aquaculture* **464**, 545-553 (2016).
- 576 9 Rotllant, G. *et al.* Identification of genes involved in reproduction and lipid pathway  
577 metabolism in wild and domesticated shrimps. *Marine genomics* **22**, 55-61 (2015).
- 578 10 Uengwetwanit, T. *et al.* Transcriptome-based discovery of pathways and genes related to  
579 reproduction of the black tiger shrimp (*Penaeus monodon*). *Marine Genomics* (2017).
- 580 11 Soonthornchai, W. *et al.* Differentially expressed transcripts in stomach of *Penaeus monodon*  
581 in response to AHPND infection. *Developmental & Comparative Immunology* **65**, 53-63  
582 (2016).
- 583 12 Chen, K. *et al.* Transcriptome and molecular pathway analysis of the hepatopancreas in the  
584 Pacific White Shrimp *Litopenaeus vannamei* under chronic low-salinity stress. *PLoS One* **10**,  
585 e0131503 (2015).
- 586 13 Li, C. *et al.* Analysis of *Litopenaeus vannamei* transcriptome using the next-generation DNA  
587 sequencing technique. *PloS one* **7**, e47442 (2012).
- 588 14 Chen, X. *et al.* Transcriptome analysis of *Litopenaeus vannamei* in response to white spot  
589 syndrome virus infection. *PLoS One* **8**, e73218 (2013).
- 590 15 Ghaffari, N. *et al.* Novel transcriptome assembly and improved annotation of the whiteleg  
591 shrimp (*Litopenaeus vannamei*), a dominant crustacean in global seafood mariculture.  
592 *Scientific reports* **4**, 7081 (2014).
- 593 16 Guo, H. *et al.* Transcriptome analysis of the Pacific white shrimp *Litopenaeus vannamei*  
594 exposed to nitrite by RNA-seq. *Fish & shellfish immunology* **35**, 2008-2016 (2013).
- 595 17 Hu, D., Pan, L., Zhao, Q. & Ren, Q. Transcriptomic response to low salinity stress in gills of  
596 the Pacific white shrimp, *Litopenaeus vannamei*. *Marine genomics* **24**, 297-304 (2015).
- 597 18 Lu, X. *et al.* Transcriptome analysis of the hepatopancreas in the Pacific white shrimp  
598 (*Litopenaeus vannamei*) under acute ammonia stress. *PloS one* **11**, e0164396 (2016).
- 599 19 Sookruksawong, S., Sun, F., Liu, Z. & Tassanakajon, A. RNA-Seq analysis reveals genes  
600 associated with resistance to Taura syndrome virus (TSV) in the Pacific white shrimp  
601 *Litopenaeus vannamei*. *Developmental & Comparative Immunology* **41**, 523-533 (2013).
- 602 20 Wei, J., Zhang, X., Yu, Y., Li, F. & Xiang, J. RNA-Seq reveals the dynamic and diverse  
603 features of digestive enzymes during early development of Pacific white shrimp *Litopenaeus*  
604 *vannamei*. *Comparative Biochemistry and Physiology Part D: Genomics and Proteomics* **11**,  
605 37-44 (2014).
- 606 21 Xue, S. *et al.* Sequencing and de novo analysis of the hemocytes transcriptome in  
607 *Litopenaeus vannamei* response to white spot syndrome virus infection. *PLoS One* **8**, e76718  
608 (2013).
- 609 22 Zeng, D. *et al.* Transcriptome analysis of Pacific white shrimp (*Litopenaeus vannamei*)  
610 hepatopancreas in response to Taura syndrome Virus (TSV) experimental infection. *PloS one*  
611 **8**, e57515 (2013).
- 612 23 Zhang, D., Wang, F., Dong, S. & Lu, Y. De novo assembly and transcriptome analysis of  
613 osmoregulation in *Litopenaeus vannamei* under three cultivated conditions with different  
614 salinities. *Gene* **578**, 185-193 (2016).
- 615 24 Powell, D., Knibb, W., Remilton, C. & Elizur, A. De-novo transcriptome analysis of the banana  
616 shrimp (*Fenneropenaeus merguensis*) and identification of genes associated with  
617 reproduction and development. *Marine genomics* **22**, 71-78 (2015).
- 618 25 Sellars, M. J., Trewin, C., McWilliam, S. M., Glaves, R. & Hertzler, P. L. Transcriptome  
619 profiles of *Penaeus* (*Marsupenaeus*) *japonicus* animal and vegetal half-embryos: identification

- 620 of sex determination, germ line, mesoderm, and other developmental genes. *Marine*  
621 *Biotechnology* **17**, 252-265 (2015).
- 622 26 Powell, D., Knibb, W. & Elizur, A. in *Proceedings of the 24th Plant and Animal Genome*  
623 *Conference*. (Plant and Animal Genome (PAG) Conference).
- 624 27 Powell, D., Knibb, W., Nguyen, N. H. & Elizur, A. Transcriptional profiling of banana shrimp  
625 *Fenneropenaeus merguensis* with differing levels of viral load. *Integrative and comparative*  
626 *biology* **56**, 1131-1143 (2016).
- 627 28 Wang, W. *et al.* Gill transcriptomes reveal involvement of cytoskeleton remodeling and  
628 immune defense in ammonia stress response in the banana shrimp *Fenneropenaeus*  
629 *merguensis*. *Fish & shellfish immunology* **71**, 319-328 (2017).
- 630 29 Li, S., Zhang, X., Sun, Z., Li, F. & Xiang, J. Transcriptome analysis on Chinese shrimp  
631 *Fenneropenaeus chinensis* during WSSV acute infection. *PLoS one* **8**, e58627 (2013).
- 632 30 Shi, X. *et al.* Transcriptome analysis of 'Huanghai No. 2' *Fenneropenaeus chinensis* response  
633 to WSSV using RNA-seq. *Fish & Shellfish Immunology* **75**, 132-138,  
634 doi:<https://doi.org/10.1016/j.fsi.2018.01.045> (2018).
- 635 31 Andrews, S. *FastQC: a quality control tool for high throughput sequence data*,  
636 <<http://www.bioinformatics.babraham.ac.uk/projects/fastqc>> (2010).
- 637 32 MacManes, M. D. Establishing evidenced-based best practice for the de novo assembly and  
638 evaluation of transcriptomes from non-model organisms. *bioRxiv*, 035642 (2016).
- 639 33 Song, L. & Florea, L. Rcorrector: efficient and accurate error correction for Illumina RNA-seq  
640 reads. *GigaScience* **4**, 1 (2015).
- 641 34 Grabherr, M. G. *et al.* Full-length transcriptome assembly from RNA-Seq data without a  
642 reference genome. *Nature biotechnology* **29**, 644-652 (2011).
- 643 35 Bolger, A. M., Lohse, M. & Usadel, B. Trimmomatic: a flexible trimmer for Illumina sequence  
644 data. *Bioinformatics*, btu170 (2014).
- 645 36 Liu, J. *et al.* BinPacker: Packing-Based De Novo Transcriptome Assembly from RNA-seq  
646 Data. *PLoS Comput Biol* **12**, e1004772 (2016).
- 647 37 Peng, Y. *et al.* IDBA-tran: a more robust de novo de Bruijn graph assembler for  
648 transcriptomes with uneven expression levels. *Bioinformatics* **29**, i326-i334 (2013).
- 649 38 Chang, Z. *et al.* Bridger: a new framework for de novo transcriptome assembly using RNA-  
650 seq data. *Genome biology* **16**, 1 (2015).
- 651 39 Gilbert, D. *EvidentialGene: tr2aacds, mRNA Transcript Assembly Software*,  
652 <[http://arthropods.eugenics.org/EvidentialGene/about/EvidentialGene\\_trassembly\\_pipe.html](http://arthropods.eugenics.org/EvidentialGene/about/EvidentialGene_trassembly_pipe.html)>  
653 (2013).
- 654 40 Smith-Unna, R., Bournnell, C., Patro, R., Hibberd, J. & Kelly, S. TransRate: reference free  
655 quality assessment of de novo transcriptome assemblies. *Genome research*, gr.  
656 196469.196115 (2016).
- 657 41 Simão, F. A., Waterhouse, R. M., Ioannidis, P., Kriventseva, E. V. & Zdobnov, E. M. BUSCO:  
658 assessing genome assembly and annotation completeness with single-copy orthologs.  
659 *Bioinformatics*, btv351 (2015).
- 660 42 Zdobnov, E. M. *et al.* OrthoDB v9. 1: cataloging evolutionary and functional annotations for  
661 animal, fungal, plant, archaeal, bacterial and viral orthologs. *Nucleic acids research* **45**, D744-  
662 D749 (2016).
- 663 43 Conesa, A. *et al.* Blast2GO: a universal tool for annotation, visualization and analysis in  
664 functional genomics research. *Bioinformatics* **21**, 3674-3676 (2005).
- 665 44 Boeckmann, B. *et al.* The SWISS-PROT protein knowledgebase and its supplement TrEMBL  
666 in 2003. *Nucleic acids research* **31**, 365-370 (2003).
- 667 45 Wucher, V. *et al.* FEELnc: a tool for long non-coding RNA annotation and its application to the  
668 dog transcriptome. *Nucleic acids research* **45**, e57-e57 (2017).

- 669 46 Langmead, B. & Salzberg, S. L. Fast gapped-read alignment with Bowtie 2. *Nature methods*  
670 **9**, 357 (2012).
- 671 47 Davidson, N. M. & Oshlack, A. Corset: enabling differential gene expression analysis for de  
672 novo assembled transcriptomes. *Genome biology* **15**, 1 (2014).
- 673 48 Love, M. I., Huber, W. & Anders, S. Moderated estimation of fold change and dispersion for  
674 RNA-seq data with DESeq2. *Genome biology* **15**, 550 (2014).
- 675 49 Racine, J. S. RStudio: A Platform-Independent IDE for R and Sweave. *Journal of Applied*  
676 *Econometrics* **27**, 167-172 (2012).
- 677 50 Baranski, M. *et al.* The development of a high density linkage map for black tiger shrimp  
678 (*Penaeus monodon*) based on cSNPs. *PLoS One* **9**, e85413 (2014).
- 679 51 Homola, E. & Chang, E. S. Methyl farnesoate: crustacean juvenile hormone in search of  
680 functions. *Comparative Biochemistry and Physiology Part B: Biochemistry and Molecular*  
681 *Biology* **117**, 347-356 (1997).
- 682 52 Michal, G. & Schomburg, D. *Biochemical pathways: an atlas of biochemistry and molecular*  
683 *biology*. (Wiley New York, 1999).
- 684 53 Jiménez, G., González-Reyes, A. & Casanova, J. Cell surface proteins Nasrat and Polehole  
685 stabilize the Torso-like extracellular determinant in *Drosophila* oogenesis. *Genes &*  
686 *development* **16**, 913-918 (2002).
- 687 54 Webster, S. G., Keller, R. & Dirksen, H. The CHH-superfamily of multifunctional peptide  
688 hormones controlling crustacean metabolism, osmoregulation, moulting, and reproduction.  
689 *General and comparative endocrinology* **175**, 217-233 (2012).
- 690 55 Morisalo, D. & Anderson, K. V. Signaling pathways that establish the dorsal-ventral pattern of  
691 the *Drosophila* embryo. *Annual review of genetics* **29**, 371-399 (1995).
- 692 56 Chew, G.-L. *et al.* Ribosome profiling reveals resemblance between long non-coding RNAs  
693 and 5' leaders of coding RNAs. *Development* **140**, 2828-2834 (2013).
- 694 57 Derrien, T. *et al.* The GENCODE v7 catalog of human long noncoding RNAs: analysis of their  
695 gene structure, evolution, and expression. *Genome research* **22**, 1775-1789 (2012).
- 696 58 Guttman, M., Russell, P., Ingolia, N. T., Weissman, J. S. & Lander, E. S. Ribosome profiling  
697 provides evidence that large noncoding RNAs do not encode proteins. *Cell* **154**, 240-251  
698 (2013).
- 699 59 Engreitz, J. M., Ollikainen, N. & Guttman, M. Long non-coding RNAs: spatial amplifiers that  
700 control nuclear structure and gene expression. *Nature Reviews Molecular Cell Biology* **17**,  
701 756 (2016).
- 702 60 Brockdorff, N. *et al.* The product of the mouse Xist gene is a 15 kb inactive X-specific  
703 transcript containing no conserved ORF and located in the nucleus. *Cell* **71**, 515-526 (1992).
- 704 61 Koerner, M. V., Pauler, F. M., Huang, R. & Barlow, D. P. The function of non-coding RNAs in  
705 genomic imprinting. *Development* **136**, 1771-1783 (2009).
- 706 62 Leucci, E. *et al.* Melanoma addiction to the long non-coding RNA SAMMSON. *Nature* **531**,  
707 518 (2016).
- 708 63 Prensner, J. R. & Chinnaiyan, A. M. The emergence of lncRNAs in cancer biology. *Cancer*  
709 *discovery* **1**, 391-407 (2011).
- 710 64 Cowley, J. A., Dimmock, C. M., Spann, K. M. & Walker, P. J. Gill-associated virus of *Penaeus*  
711 *monodon* prawns: an invertebrate virus with ORF1a and ORF1b genes related to arteri- and  
712 coronaviruses. *Journal of General Virology* **81**, 1473-1484 (2000).
- 713 65 Cowley, J. A. *et al.* *Tactical Research Fund: Aquatic Animal Health Subprogram: Viral*  
714 *presence, prevalence and disease management in wild populations of the Australian Black*  
715 *Tiger prawn (Penaeus monodon)*. (FRDC, 2015).
- 716 66 Mohr, P. G. *et al.* New yellow head virus genotype (YHV7) in giant tiger shrimp *Penaeus*  
717 *monodon* indigenous to northern Australia. *Diseases of aquatic organisms* **115**, 263-268  
718 (2015).

- 719 67 Owens, L., La Fauce, K. & Claydon, K. The effect of *Penaeus merguensis* densovirus on  
720 *Penaeus merguensis* production in Queensland, Australia. *Journal of fish diseases* **34**, 509-  
721 515 (2011).
- 722 68 Li, C.-X. *et al.* Unprecedented genomic diversity of RNA viruses in arthropods reveals the  
723 ancestry of negative-sense RNA viruses. *Elife* **4** (2015).
- 724 69 Shi, M. *et al.* Redefining the invertebrate RNA virosphere. *Nature* **540**, 539 (2016).
- 725 70 Lanzi, G. *et al.* Molecular and biological characterization of deformed wing virus of honeybees  
726 (*Apis mellifera* L.). *Journal of virology* **80**, 4998-5009 (2006).
- 727 71 Valles, S. *et al.* ICTV virus taxonomy profile: Iflavriridae. *Journal of General Virology* **98**, 527-  
728 528 (2017).
- 729 72 Department of Agriculture and Fisheries, Q. G. *Varroa mite detection in Townsville*,  
730 <<https://www.daf.qld.gov.au/business-priorities/animal-industries/bees/diseases-and-pests/asian-honey-bees/general-information-on-varroa-mites>> (2017).  
731
- 732 73 Roberts, J. M., Anderson, D. L. & Durr, P. A. Absence of deformed wing virus and *Varroa*  
733 destructor in Australia provides unique perspectives on honeybee viral landscapes and colony  
734 losses. *Scientific Reports* **7**, 6925 (2017).
- 735 74 Shen, C.-H. & Steiner, L. A. Genome structure and thymic expression of an endogenous  
736 retrovirus in zebrafish. *Journal of virology* **78**, 899-911 (2004).
- 737 75 Sakaew, W., Pratoomthai, B., Pongtippatee, P., Flegel, T. W. & Withyachumnarnkul, B.  
738 Discovery and partial characterization of a non-LTR retrotransposon that may be associated  
739 with abdominal segment deformity disease (ASDD) in the whiteleg shrimp *Penaeus*  
740 (*Litopenaeus*) *vannamei*. *BMC veterinary research* **9**, 189 (2013).

741

## 742 **Supplementary Material**

743 **Supplementary Table 1** contains all annotation results from the blast against  
744 SwissProt and nrA (arthropod subsection of the nr database), including blast metrics,  
745 GO terms, interpro scan results and simplified lncRNA results.

746 **Supplementary Table 2** contains the top 2,000 differentially expressed genes in the  
747 nine different tissue types used in the heatmap. The table shows normalised  
748 expression values for each sample, the nine groupings based on Pearson's  
749 correlation presented in the heatmap, and the associated SwissProt and nrA  
750 annotations.

751 **Supplementary Table 3** contains the top 500 differentially expressed genes in the  
752 eight early life-history stages used in the heatmap. The table shows normalised  
753 expression values for each sample, the nine groupings based on Pearson's  
754 correlation presented in the heatmap, and the associated SwissProt and nrA  
755 annotations.

756 **Supplementary Table 4** contains the detailed results of the lncRNA analysis using  
757 the FEELnc pipeline.

758 **Supplementary Table 5** contains links to the 235 KEGG pathway figures based on  
759 the transcriptome generated in this study.

760 **Supplementary Table 6** contains all successful blast hits against the viral  
761 subsection of the nr database.
